# Supplementary figures and images for: Eps homology domain endosomal transport proteins differentially localize to the neuromuscular junction
Source: Springer Nature journal article supplement (doi:10.1186/2044-5040-2-19), 2012-09-13

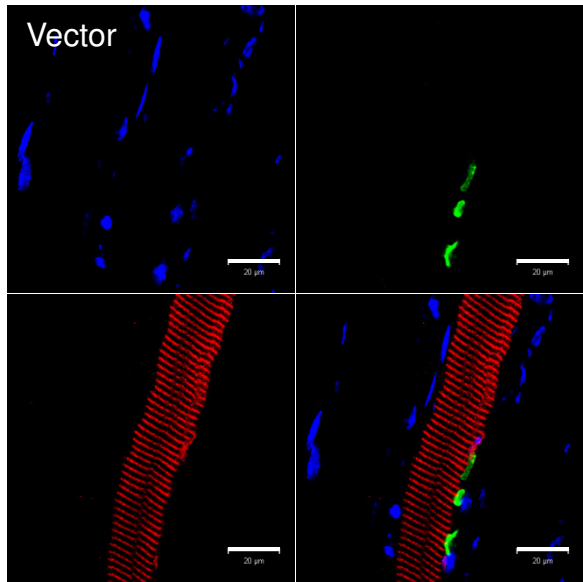

3 Day Expression

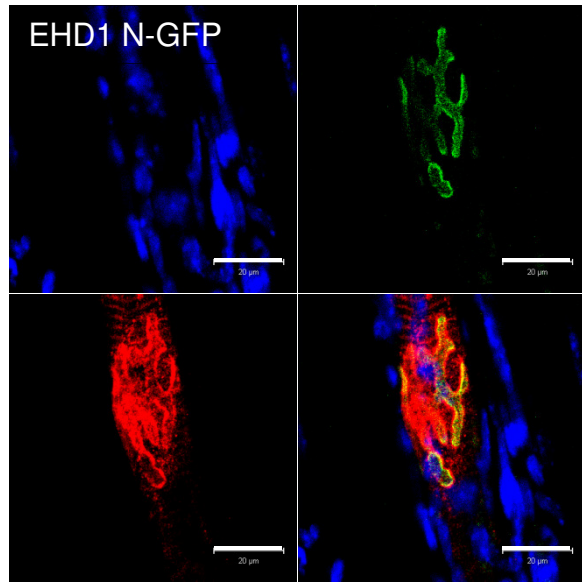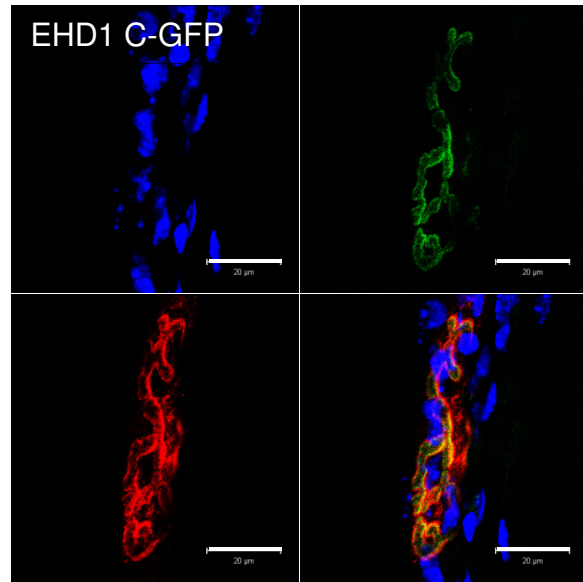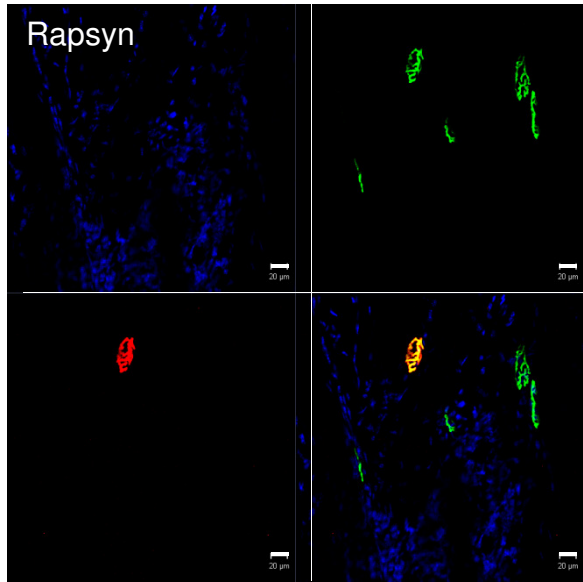

14 Day Expression

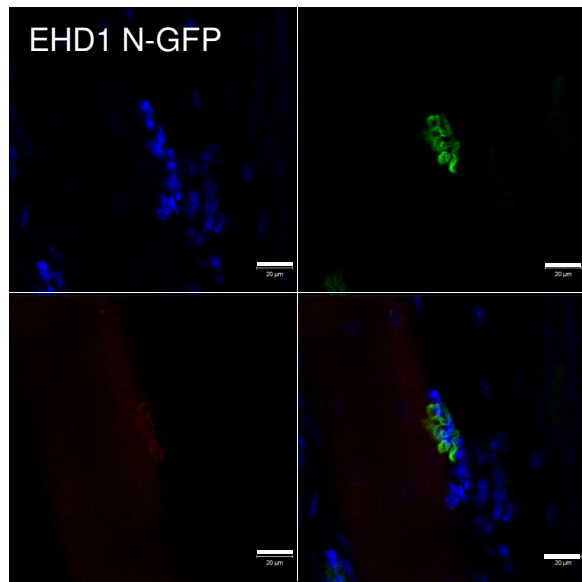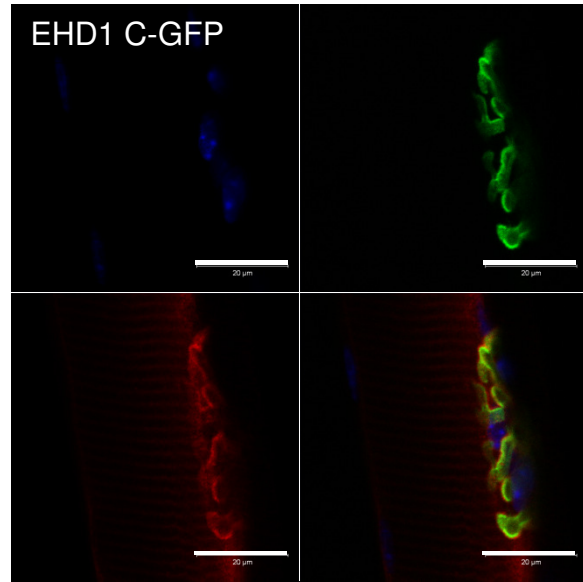

Supplement: 13395_2012_57_MOESM1_ESM.pdf [file 13395_2012_57_MOESM1_ESM.pdf]
